# Supplementary material for: Cyclostratigraphy of the Middle to Upper Ordovician successions of the Armorican Massif (western France) using portable X-ray fluorescence
Source: Copernicus journal article supplement (doi:10.5194/gchron-4-251-2022), 2022-05-16
Supplement: Supplementary file 2 [file gchron-4-251-2022-supplement.zip]

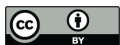

*Supplement of*

**Cyclostratigraphy of the Middle to Upper Ordovician successions of the Armorican Massif (western France) using portable X-ray fluorescence**

**Matthias Sinnesael et al.**

*Correspondence to:* Matthias Sinnesael ([matthias.sinnesael@obspm.fr](mailto:matthias.sinnesael@obspm.fr))

- [gchron-4-251-2022-supplement-title-page.pdf](#)
- Supplement
  - [DATA.xlsx](#)
  - [Kerarmor Mb Postolonnec Data log 2016.pdf](#)
  - [Morgat Mb Postolonnec Data log 2017.pdf](#)
  - [Sinnesael\\_et\\_al\\_BRET\\_Cyclostratigraphy\\_R\\_scripts.R](#)

The copyright of individual parts of the supplement might differ from the article licence.
