# Supplementary material for: Cyclostratigraphy of the Middle to Upper Ordovician successions of the Armorican Massif (western France) using portable X-ray fluorescence
Source: Copernicus journal article supplement (doi:10.5194/gchron-4-251-2022), 2022-05-16
Supplement: Supplementary file 3 [file gchron-4-251-2022-supplement.zip]

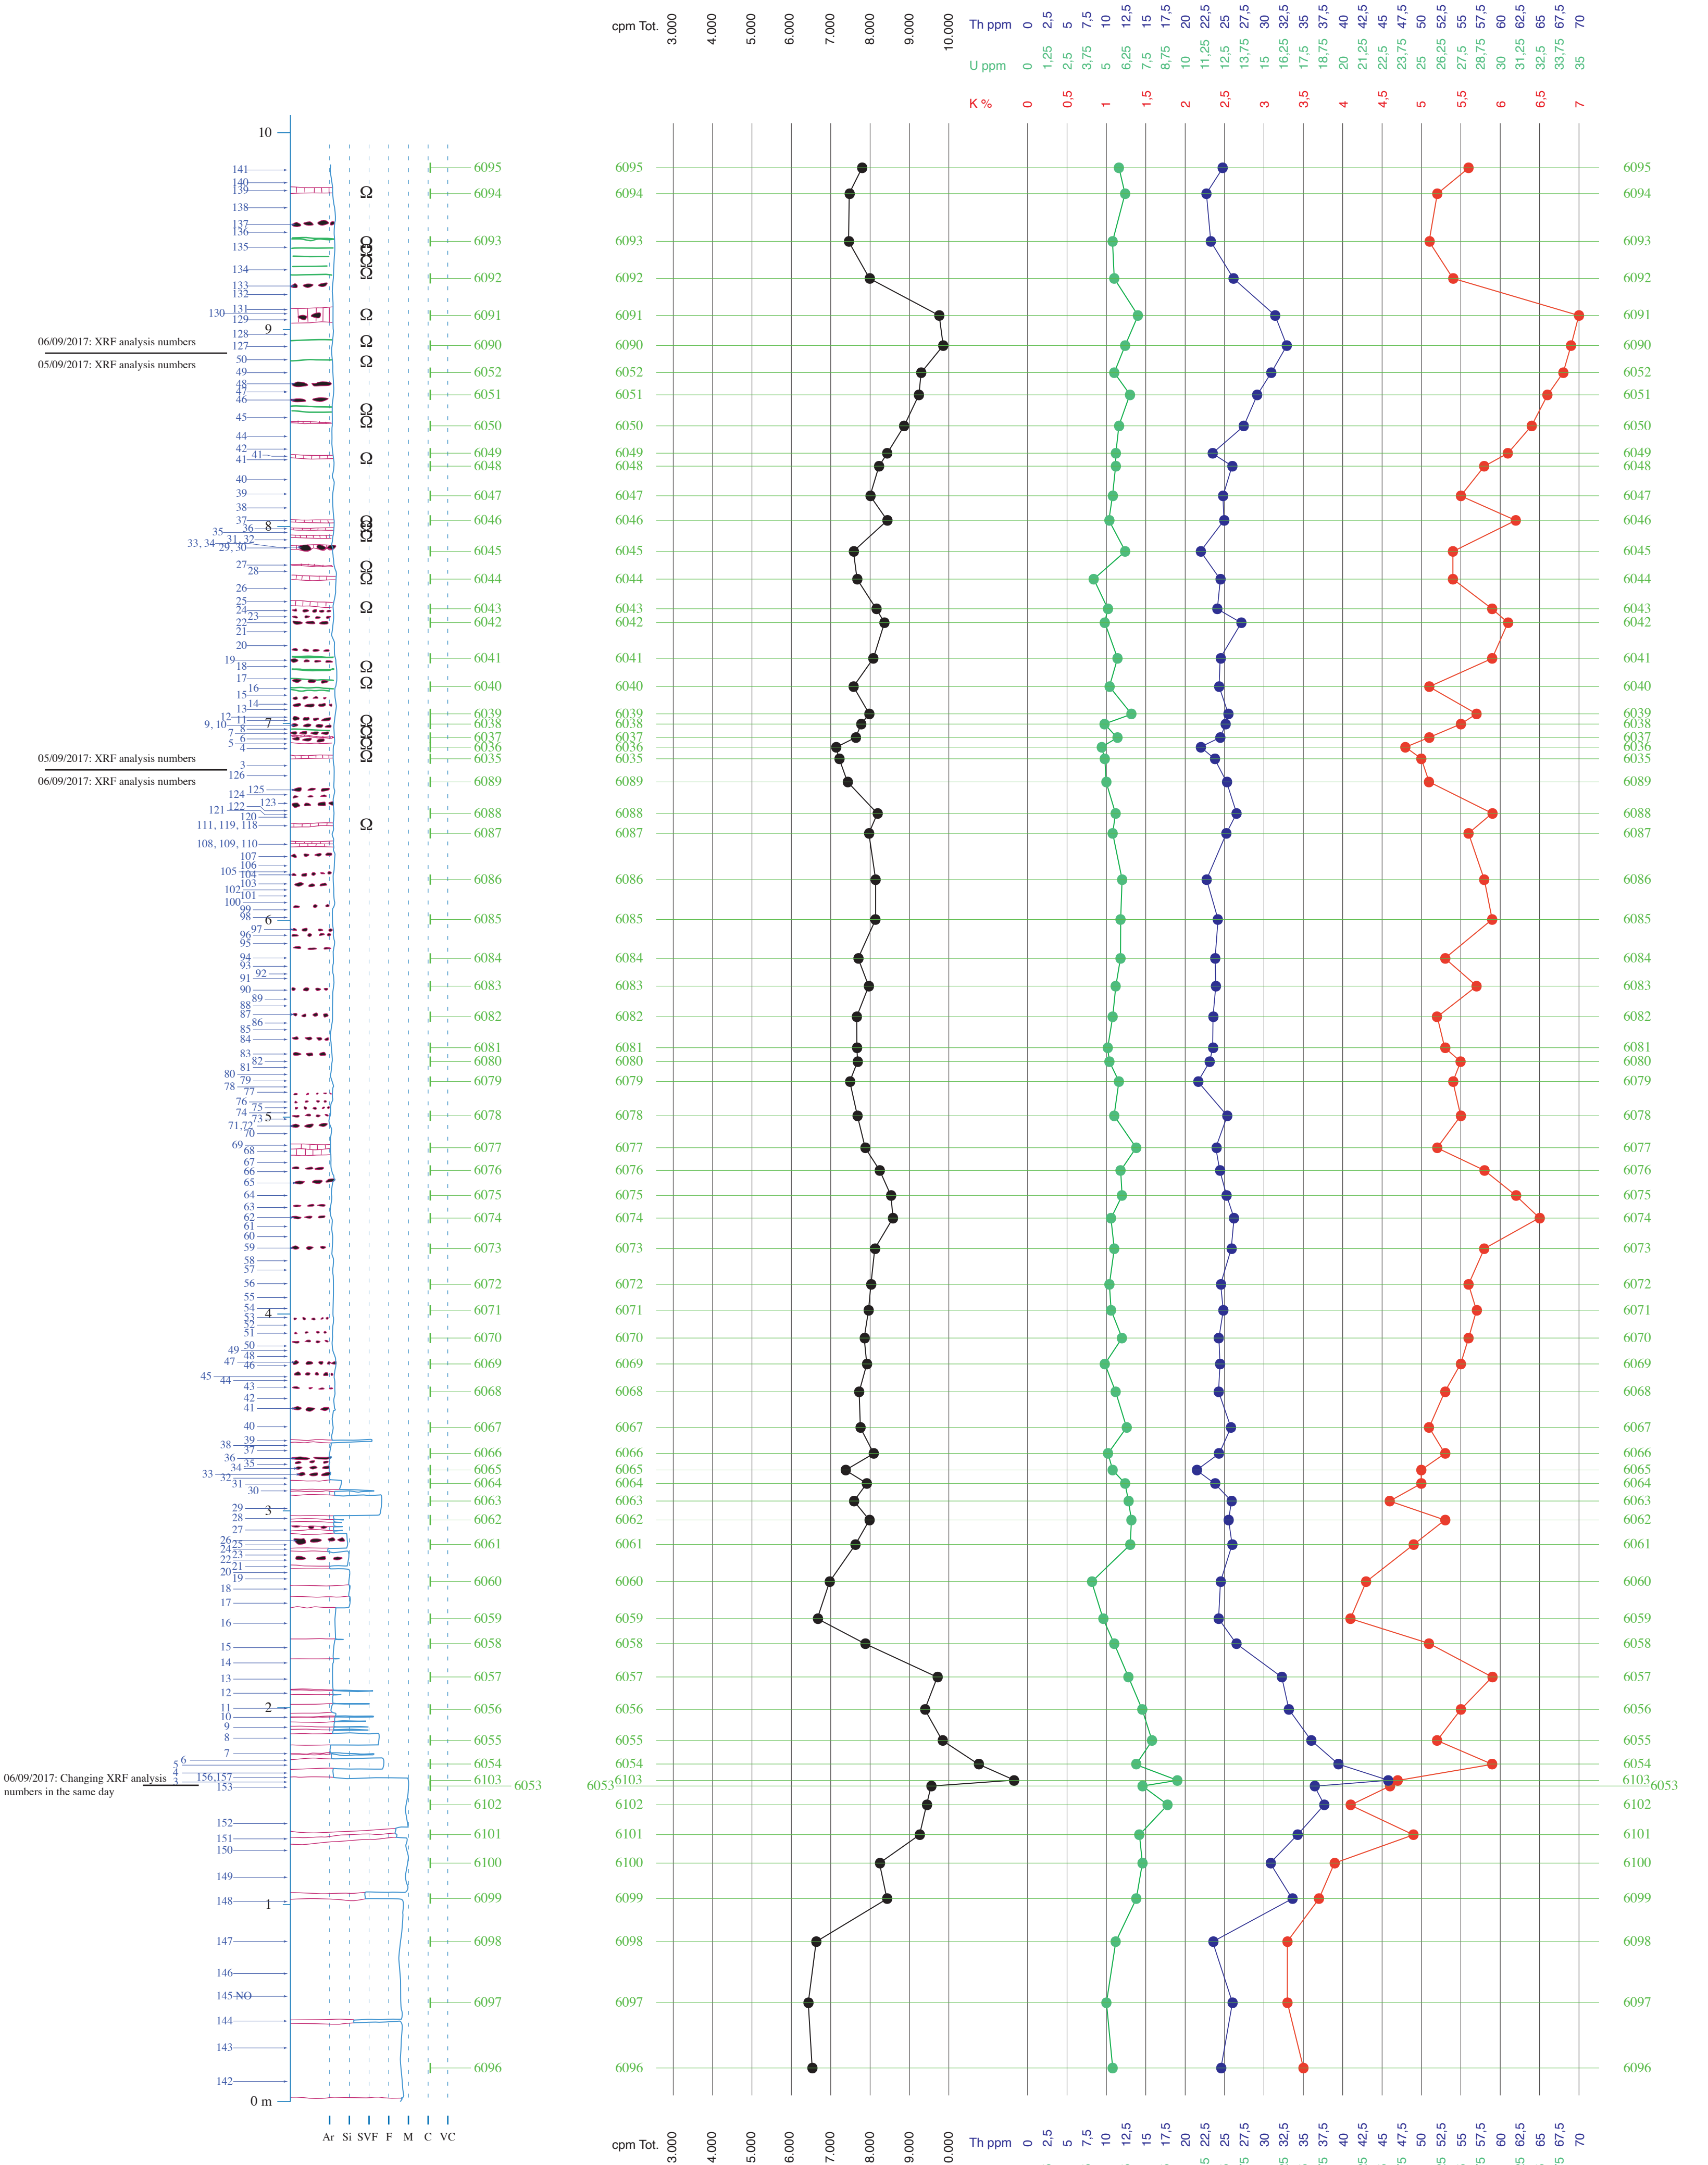

SECTION : POSTOLONNEC (beach)  
(Measured by: Marie Pierre Dabard, Alfredo Loi and Matthias Sinnesael)  
Date of measurement: 04/09/2017 to 06/09/2017.  
Scale: 1:20  
Formation of Postolonnec; Member of Morgat.  
The section represents the upper part of the Kerarvail Member and the base of the Morgat Member, measured close to the cliff.  
Granulometric scale: Ar (argilites), Si (siltstone), SVF (very fine sandstone), F (fine sandstone), M (medium sandstone), C (coarse sandstone), VC (very coarse sandstone).  
Thin shellbeds: Ω  
Large Shellbeds  
Nodules  
XRF analysis numbers  
Gamma Ray analysis numbers
